# Supplementary material for: Lanthanum(iii) triflate supported on nanomagnetic γ-Fe2O3: a new magnetically recyclable heterogeneous Lewis acid for the one-pot synthesis of β-phosphonomalonates
Source: Royal Society of Chemistry journal article supplement (doi:10.1039/c4ra00543k), 2014-01-01

## Supporting information

### Lanthanum (III) triflate supported on nanomagnetic $\gamma$ -Fe<sub>2</sub>O<sub>3</sub>: A new magnetically recyclable heterogeneous Lewis acid for the one-pot synthesis of $\beta$ -phosphonomalonates

Sara Sobhani,\* Zahra Pakdin-Parizi

Department of Chemistry, College of Sciences, University of Birjand, Birjand, Iran

\*Corresponding author. Tel. +98 (561) 2502065; Fax: +98 (561) 2502065

*E-mail address: ssobhani@birjand.ac.ir, sobhanisara@yahoo.com*

#### Contents

|                                                                                                     |      |
|-----------------------------------------------------------------------------------------------------|------|
| 1) General Information.....                                                                         | 2    |
| 2) Spectral Data of Unknown $\beta$ -Phosphonomalonates.....                                        | 2-3  |
| 3) Spectral Data of known $\beta$ -Phosphonomalonates.....                                          | 3-7  |
| 4) <sup>1</sup> H NMR, <sup>13</sup> C NMR, IR and mass spectra of $\beta$ -Phosphonomalonates..... | 8-13 |

## 1) General Information

Chemicals were purchased from Merck Chemical Company. NMR spectra were recorded on a Bruker Avance DPX-250 and 400 in  $\text{CDCl}_3$  as solvent and TMS as internal standard. The purity of the products and the progress of the reactions were accomplished by TLC on silica-gel polygram SILG/UV<sub>254</sub> plates. HRTEM analysis was performed using HRTEM microscope (Philips CM30). FT-IR spectra were recorded on a Shimadzu Fourier Transform Infrared Spectrophotometer (FT-IR-8300). IR spectra were run on a Perkin Elmer 780 instrument. Mass spectra were recorded on a Shimadzu GCMS-QP5050A. Thermo gravimetric analysis (TGA) was performed using a Shimadzu thermo gravimetric analyser (TG-50). Power X-ray diffraction (XRD) was performed on a Bruker D8-advance X-ray diffractometer with  $\text{Cu K}_\alpha$  ( $\lambda = 0.154 \text{ nm}$ ) radiation. Room temperature magnetization isotherms were obtained using a vibrating sample magnetometer (VSM, LakeShore 7400). The content of La in the catalyst was determined by ICP-OES VISTA-PRO inductively coupled plasma analyzer.

## 2) Spectral Data of Unknown $\beta$ -Phosphonomalonates

### [1-(3-Bromophenyl)-2,2-dicyanoethyl] Phosphonic Acid Diethyl Ester (6)

$^1\text{H}$  NMR (400 MHz,  $\text{CDCl}_3$ ):  $\delta = 1.14$  (t,  $^3J_{\text{HH}} = 7.2 \text{ Hz}$ , 3 H,  $\text{CH}_3$ ), 1.31 (t,  $^3J_{\text{HH}} = 7.2 \text{ Hz}$ , 3 H,  $\text{CH}_3$ ), 3.65 (dd,  $^3J_{\text{HH}} = 7.6 \text{ Hz}$ ,  $^2J_{\text{HP}} = 21.6 \text{ Hz}$ , 1 H, CH), 3.81-4.19 (m, 4 H,  $\text{CH}_2$ ), 4.7 (dd,  $^3J_{\text{HH}} = 8.0 \text{ Hz}$ ,  $^2J_{\text{HP}} = 9.2 \text{ Hz}$ , 1 H, CH), 7.28 (t,  $^3J_{\text{HH}} = 8.0 \text{ Hz}$ , 1 H, Ar), 7.44 (d,  $^3J_{\text{HH}} = 7.2 \text{ Hz}$ , 1 H, Ar), 7.52 (d,  $^3J_{\text{HH}} = 8.0 \text{ Hz}$ , 1 H, Ar), 7.62 (s, 1 H, Ar).  $^{13}\text{C}$  NMR (100 MHz,  $\text{CDCl}_3$ ):  $\delta = 16.1$  (d,  $^3J_{\text{CP}} = 5.0 \text{ Hz}$ ), 16.2 (d,  $^3J_{\text{CP}} = 6.0 \text{ Hz}$ ), 25.3, 43.8 (d,  $^1J_{\text{CP}} = 143.0 \text{ Hz}$ ), 63.6 (d,  $^2J_{\text{CP}} = 7.0 \text{ Hz}$ ), 64.4 (d,  $^2J_{\text{CP}} = 7.0 \text{ Hz}$ ), 111.3 (d,  $^3J_{\text{CP}} = 12.1 \text{ Hz}$ ), 111.4 (d,  $^3J_{\text{CP}} = 11.1 \text{ Hz}$ ), 123.1, 127.9 (d,  $^3J_{\text{CP}} = 6.0 \text{ Hz}$ ), 130.8, 132.4 (d,  $^2J_{\text{CP}} = 6.0 \text{ Hz}$ ), 132.6, 132.8 (d,  $^3J_{\text{CP}} = 6.0 \text{ Hz}$ ). MS (EI, 70 eV):  $m/z$  (%) = 370 (22  $\text{M}^+$ ), 372 (22  $\text{M}^+ + 2$ ), 207 (80), 209 (80), 138 (100%). IR (KBr): 2242 (CN), 1003 (P=O)

cm<sup>-1</sup>. Anal. Calcd for C<sub>14</sub>H<sub>16</sub>BrN<sub>2</sub>O<sub>3</sub>P: C, 45.30; H, 4.34; N, 7.5. Found: C, 44.33; H, 4.12; N, 7.39.

### **[1,1-Dicyanopentan-2-yl] Phosphonic Acid Diethyl Ester (13)**

<sup>1</sup>H NMR (250 MHz, CDCl<sub>3</sub>): δ = 1.00 (t, <sup>3</sup>J<sub>HH</sub> = 7.0 Hz, 3 H, CH<sub>3</sub>), 1.37 (t, <sup>3</sup>J<sub>HH</sub> = 7.0 Hz, 6 H, CH<sub>3</sub>), 1.61 (q, <sup>3</sup>J<sub>HH</sub> = 7.0 Hz, 2 H, CH<sub>2</sub>), 1.73-2.10 (m, 2 H, CH<sub>2</sub>), 2.29-2.34 (m, 1 H, CH), 4.16-4.25 (m, 4 H, CH<sub>2</sub>), 4.29-4.35 (m, 1 H, CH). <sup>13</sup>C NMR (62.9 MHz, CDCl<sub>3</sub>): δ = 13.7, 16.3 (d, <sup>3</sup>J<sub>CP</sub> = 5.6 Hz), 20.7 (d, <sup>2</sup>J<sub>CP</sub> = 7.6 Hz), 23.7, 29.2, 37.8 (d, <sup>1</sup>J<sub>CP</sub> = 144.9 Hz), 63.2 (d, <sup>2</sup>J<sub>CP</sub> = 11.0 Hz), 110.7 (d, <sup>3</sup>J<sub>CP</sub> = 5.0 Hz), 112.2 (d, <sup>3</sup>J<sub>CP</sub> = 17.0 Hz). MS (EI, 70 eV): *m/z* (%) = 259 (5 M<sup>+</sup>+1), 138 (100), 121 [20 M<sup>+</sup>-P(O)(OEt)<sub>2</sub>]. IR (KBr): 2240 (CN), 1011 (P=O) cm<sup>-1</sup>. Anal. Calcd for C<sub>11</sub>H<sub>19</sub>N<sub>2</sub>O<sub>3</sub>P: C, 51.16; H, 7.42; N, 10.85. Found: C, 50.99; H, 7.57; N, 10.71.

### **[1, 1-Dicyanooctan-2-yl] Phosphonic Acid Diethyl Ester (14)**

<sup>1</sup>H NMR (400 MHz, CDCl<sub>3</sub>): δ = 0.81 (t, <sup>3</sup>J<sub>HH</sub> = 6.8 Hz, 3 H, CH<sub>3</sub>), 1.23-1.25 (m, 6 H, CH<sub>3</sub>), 1.29 (t, <sup>3</sup>J<sub>HH</sub> = 7.2 Hz, 6 H, CH<sub>2</sub>), 1.45-1.50 (m, 2 H, CH<sub>2</sub>), 1.66-1.79 (m, 1 H), 1.86-1.98 (m, 1 H, CH<sub>2</sub>), 2.25-2.34 (m, 1 H, CH), 4.08-4.16 (m, 4 H, CH<sub>2</sub>), 4.36 (dd, <sup>3</sup>J<sub>HP</sub> = 13.2 Hz, <sup>3</sup>J<sub>HH</sub> = 3.6 Hz, 1 H, CH). <sup>13</sup>C NMR (62.9 MHz, CDCl<sub>3</sub>): δ = 13.9, 16.21 (d, <sup>3</sup>J<sub>CP</sub> = 5.0 Hz), 22.3, 23.7, 27.1, 27.2 (d, <sup>3</sup>J<sub>CP</sub> = 6.0 Hz), 28.8, 31.2, 37.7 (d, <sup>1</sup>J<sub>CP</sub> = 143.0 Hz), 63.1 (d, <sup>2</sup>J<sub>CP</sub> = 7.0 Hz), 111.1 (d, <sup>3</sup>J<sub>CP</sub> = 3.0 Hz), 112.3 (d, <sup>3</sup>J<sub>CP</sub> = 17.0 Hz). MS (EI, 70 eV): *m/z* (%) = 301 (2 M<sup>+</sup>+1), 163 [21 M<sup>+</sup>-P(O)(OEt)<sub>2</sub>], 138 (100), 111 (58), 81 (70). IR (KBr): 2238 (CN), 1011 (P=O) cm<sup>-1</sup>. Anal. Calcd for C<sub>14</sub>H<sub>25</sub>N<sub>2</sub>O<sub>3</sub>P: C, 55.99; H, 8.39; N, 9.33. Found: C, 55.36; H, 8.03; N 9.20.

## **3) Spectral Data of Known β-Phosphonomalonates**

### **[1-Phenyl-2,2-dicyanoethyl] Phosphonic Acid Diethyl Ester (1)**

$^1\text{H}$  NMR (250 MHz,  $\text{CDCl}_3$ ):  $\delta$  = 1.11 (t,  $^3J_{\text{HH}} = 6.8$  Hz, 3 H,  $\text{CH}_3$ ), 1.33 (t,  $^3J_{\text{HH}} = 7.0$  Hz, 3 H,  $\text{CH}_3$ ), 3.65 (dd,  $^3J_{\text{HH}} = 8.0$ ,  $^2J_{\text{HP}} = 21.0$  Hz, 1 H, CH), 3.91-4.21 (m, 4 H,  $\text{CH}_2$ ), 4.55 (t,  $^3J_{\text{HH}} = 8.3$  Hz, 1 H, CH), 7.43 (s, 5 H, Ar).

**[1-(4-Chlorophenyl)-2,2-dicyanoethyl] Phosphonic Acid Diethyl Ester (2)**

$^1\text{H}$  NMR (250 MHz,  $\text{CDCl}_3$ ):  $\delta$  = 1.16 (t,  $^3J_{\text{HH}} = 7.0$  Hz, 3 H,  $\text{CH}_3$ ), 1.33 (t,  $^3J_{\text{HH}} = 7.0$  Hz, 3 H,  $\text{CH}_3$ ), 3.62 (dd,  $^2J_{\text{HP}} = 21.5$ ,  $^3J_{\text{HH}} = 7.5$  Hz, 1 H, CH), 3.82-4.19 (m, 4 H,  $\text{CH}_2$ ), 4.55 (t,  $^3J_{\text{HH}} = 7.7$  Hz, 1 H, CH), 7.42 (s, 4 H, Ar).

**[1-(3-Chlorophenyl)-2,2-dicyanoethyl] Phosphonic Acid Diethyl Ester (3)**

$^1\text{H}$  NMR (400 MHz,  $\text{CDCl}_3$ ):  $\delta$  = 1.20 (t,  $^3J_{\text{HH}} = 7.2$  Hz, 3 H,  $\text{CH}_3$ ), 1.38 (t,  $^3J_{\text{HH}} = 7.2$  Hz, 3 H,  $\text{CH}_3$ ), 3.60 (dd,  $^3J_{\text{HH}} = 8.0$  Hz,  $^2J_{\text{HP}} = 21.2$  Hz, 1 H, CH), 3.83-3.93 (m, 1 H, CH), 4.03-4.26 (m, 3 H,  $\text{CH}_2$ ), 4.56 (dd,  $^3J_{\text{HP}} = 9.2$  Hz,  $^3J_{\text{HH}} = 8.0$  Hz, 1 H, CH), 7.41-7.45 (m, 3 H, Ar), 7.50 (s, 1 H, Ar).

**[1-(2-Chlorophenyl)-2,2-dicyanoethyl] Phosphonic Acid Diethyl Ester (4)**

$^1\text{H}$  NMR (400 MHz,  $\text{CDCl}_3$ ):  $\delta$  = 1.11 (t,  $^3J_{\text{HH}} = 7.0$  Hz, 3 H,  $\text{CH}_3$ ), 1.36 (t,  $^3J_{\text{HH}} = 7.0$  Hz, 3 H,  $\text{CH}_3$ ), 3.75-4.30 (m, 4 H,  $\text{CH}_2$ ), 4.46 (dd,  $^2J_{\text{HP}} = 21.2$  Hz,  $^3J_{\text{HH}} = 8.2$ , 1 H, CH), 4.61 (t,  $^3J_{\text{HH}} = 8.5$  Hz, 1 H, CH), 7.35 (d,  $^3J_{\text{HH}} = 4$  Hz, 2 H, Ar), 7.47 (s, 1 H, Ar), 7.75 (d,  $^3J_{\text{HH}} = 5.3$  Hz, 1 H, Ar).

**[1-(4-Bromophenyl)-2,2-dicyanoethyl] Phosphonic Acid Diethyl Ester (5)**

$^1\text{H}$  NMR (250 MHz,  $\text{CDCl}_3$ ):  $\delta$  = 1.16 (t,  $^3J_{\text{HH}} = 7.0$  Hz, 3 H,  $\text{CH}_3$ ), 1.33 (t,  $^3J_{\text{HH}} = 7.0$  Hz, 3 H,  $\text{CH}_3$ ), 3.58 (dd,  $^2J_{\text{HP}} = 21.5$  Hz,  $^3J_{\text{HH}} = 7.5$  Hz, 1 H, CH), 3.79-4.18 (m, 4 H,  $\text{CH}_2$ ), 4.56 (t,  $^3J_{\text{HH}} = 7.75$  Hz, 1 H, CH), 7.36 (d,  $^3J_{\text{HH}} = 8.25$  Hz, 2 H, Ar), 7.56 (d,  $^3J_{\text{HH}} = 8.0$  Hz, 2 H, Ar).

$^{13}\text{C}$  NMR (62.9 MHz,  $\text{CDCl}_3$ ):  $\delta$  = 16.1 (d,  $^3J_{\text{CP}} = 4.4$  Hz), 16.2 (d,  $^3J_{\text{CP}} = 5.7$  Hz), 25.4, 43.9 (d,  $^1J_{\text{CP}} = 144.7$  Hz), 63.6 (d,  $^2J_{\text{CP}} = 7.5$  Hz), 64.4 (d,  $^2J_{\text{CP}} = 7.5$  Hz), 111.0 (d,  $^3J_{\text{CP}} = 11.9$  Hz), 111.2 (d,  $^3J_{\text{CP}} = 10.7$  Hz), 123.9, 129.4, 131.0, 132.5.  $^{31}\text{P}$  NMR (101 MHz,  $\text{CDCl}_3$ ):  $\delta$  = 19.27. MS (EI,

70 eV):  $m/z$  (%) = 370 (13  $M^+$ ), 372 (8  $M^{+2}$ ), 233 [8  $M^+$ -P(O)(OEt)<sub>2</sub>], 235 [9 ( $M^{+2}$ )-P(O)(OEt)<sub>2</sub>], 207 (100), 209 (97), 138 (64). IR (KBr): 2242 (CN), 1000 (P=O)  $\text{cm}^{-1}$ . Anal. Calcd for C<sub>14</sub>H<sub>16</sub>BrN<sub>2</sub>O<sub>3</sub>P: C, 45.30; H, 4.34; N, 7.55. Found: C, 44.46; H, 4.15; N, 7.39.

#### **[1-(4-Methoxy)-2,2-dicyanoethyl] Phosphonic Acid Diethyl Ester (7)**

<sup>1</sup>H NMR (400 MHz, CDCl<sub>3</sub>):  $\delta$  = 1.17 (t, <sup>3</sup> $J_{\text{HH}}$  = 7.2 Hz, 3 H, CH<sub>3</sub>), 1.37 (t, <sup>3</sup> $J_{\text{HH}}$  = 7.2 Hz, 3 H, CH<sub>3</sub>), 3.57 (dd, <sup>2</sup> $J_{\text{HP}}$  = 21.2, <sup>3</sup> $J_{\text{HH}}$  = 8.0 Hz, 1 H, CH), 3.84 (s, 3 H, CH<sub>3</sub>), 4.00–4.24 (m, 4 H, CH<sub>2</sub>), 4.51 (dd, <sup>3</sup> $J_{\text{HP}}$  = 8.8 Hz, <sup>3</sup> $J_{\text{HH}}$  = 8.0 Hz, 1 H, CH), 6.97 (d, <sup>3</sup> $J_{\text{HH}}$  = 8.8 Hz, 2 H, Ar), 7.41–7.44 (m, 2 H, Ar).

#### **[1-(3-Methoxyphenyl)-2,2-dicyanoethyl] Phosphonic Acid Diethyl Ester (8)**

<sup>1</sup>H NMR (250 MHz, CDCl<sub>3</sub>):  $\delta$  = 1.11 (t, <sup>3</sup> $J_{\text{HH}}$  = 6.7 Hz, 3 H, CH<sub>3</sub>), 1.31 (t, <sup>3</sup> $J_{\text{HH}}$  = 6.5 Hz, 3 H, CH<sub>3</sub>), 3.56 (dd, <sup>2</sup> $J_{\text{HP}}$  = 21.0 Hz, <sup>3</sup> $J_{\text{HH}}$  = 7.8 Hz, 1H, CH), 3.78 (s, 3H, CH<sub>3</sub>), 3.94–4.16 (m, 4H, CH<sub>2</sub>), 4.57 (t, <sup>3</sup> $J_{\text{HH}}$ , <sup>3</sup> $J_{\text{HP}}$  = 8.0 Hz, 1H, CH), 6.91 (d, <sup>3</sup> $J_{\text{HH}}$  = 7.5 Hz, 2H, Ar), 7.00 (s, 1H, Ar), 7.30 (t, <sup>3</sup> $J_{\text{HH}}$  = 7.5 Hz, 1H, Ar). <sup>13</sup>C NMR (62.9 MHz, CDCl<sub>3</sub>, TMS, ppm):  $\delta$  = 16.1 (d, <sup>3</sup> $J_{\text{CP}}$  = 6.3 Hz), 16.2 (d, <sup>3</sup> $J_{\text{CP}}$  = 6.9 Hz), 25.5, 44.5 (d, <sup>1</sup> $J_{\text{CP}}$  = 144.9 Hz), 55.3, 63.4 (d, <sup>2</sup> $J_{\text{CP}}$  = 7.6 Hz), 64.4 (d, <sup>2</sup> $J_{\text{CP}}$  = 6.9 Hz), 111.2 (d, <sup>3</sup> $J_{\text{CP}}$  = 11.2 Hz), 111.3 (d, <sup>3</sup> $J_{\text{CP}}$  = 10.0 Hz), 114.9, 121.4, 130.4, 131.7, 160.1, 160.3. MS (EI, 70 eV):  $m/z$  (%) = 322 ( $M^+$ ), 185 [ $M^+$ -P(O)(OEt)<sub>2</sub>]. Anal. Calcd for C<sub>15</sub>H<sub>19</sub>N<sub>2</sub>O<sub>4</sub>P: C, 55.90; H, 5.94; N, 8.69. Found: C, 55.67; H, 5.92; N, 8.67.

#### **[1-(4-Hydroxyphenyl)-2,2-dicyanoethyl] Phosphonic Acid Diethyl Ester (9)**

<sup>1</sup>H NMR (250 MHz, CDCl<sub>3</sub>): 1.19 (t, <sup>3</sup> $J_{\text{HH}}$  = 7.0 Hz, 3H, CH<sub>3</sub>), 1.38 (t, <sup>3</sup> $J_{\text{HH}}$  = 7.0 Hz, 3H, CH<sub>3</sub>), 3.53 (dd, <sup>3</sup> $J_{\text{HH}}$  = 7.8 Hz, <sup>2</sup> $J_{\text{HP}}$  = 21.3 Hz, 1H, CH), 3.79–4.23 (m, 4H, CH<sub>2</sub>), 4.43 (t, 1H, <sup>3</sup> $J_{\text{HH}}$ , <sup>3</sup> $J_{\text{HP}}$  = 8.0 Hz), 6.8 (d, <sup>3</sup> $J_{\text{HH}}$  = 8.4 Hz, 2H, Ar), 7.26 (d, <sup>3</sup> $J_{\text{HH}}$  = 8.4 Hz, 2H, Ar). <sup>13</sup>C NMR (62.9 Hz, CDCl<sub>3</sub>, TMS, ppm):  $\delta$  = 16.3, 25.7, 43.9 (d, <sup>1</sup> $J_{\text{CP}}$  = 144.7 Hz), 63.8 (d, <sup>2</sup> $J_{\text{CP}}$  = 7.5 Hz), 64.6 (d, <sup>2</sup> $J_{\text{CP}}$  = 7.5 Hz), 111.0 (d, <sup>3</sup> $J_{\text{CP}}$  = 11.2 Hz), 111.2 (d, <sup>3</sup> $J_{\text{CP}}$  = 10.0 Hz), 116.6, 120.7, 130.5,

157.6. MS (EI, 70 eV):  $m/z$  (%) = 308 ( $M^+$ ), 171 [ $M^+$ - P(O)(OEt)<sub>2</sub>]. Anal. Calcd for C<sub>14</sub>H<sub>17</sub>N<sub>2</sub>O<sub>4</sub>P: C, 54.55; H, 5.56; N, 9.09. Found: C, 54.54; H, 5.54; N, 9.06.

**[1-(4-Methyl)-2,2-dicyanoethyl] Phosphonic Acid Diethyl Ester (10)**

<sup>1</sup>H NMR (400 MHz, CDCl<sub>3</sub>): δ = 1.16 (t, <sup>3</sup>J<sub>HH</sub> = 7.2 Hz, 3 H, CH<sub>3</sub>), 1.38 (t, <sup>3</sup>J<sub>HH</sub> = 7.2 Hz, 3 H, CH<sub>3</sub>), 2.40 (s, 3 H, CH<sub>3</sub>), 3.57 (dd, <sup>3</sup>J<sub>HH</sub> = 8.0 Hz, <sup>2</sup>J<sub>HP</sub> = 21.2 Hz, 1 H, CH), 3.74–3.84 (m, 2 H, CH<sub>2</sub>), 3.99–4.06 (m, 2 H, CH<sub>2</sub>), 4.50 (dd, <sup>3</sup>J<sub>HH</sub> = 8.4 Hz, <sup>3</sup>J<sub>HP</sub> = 9.0 Hz, 1 H, CH), 7.25–7.29 (m, 2 H, Ar), 7.37–7.39 (m, 2 H, Ar).

**[1-(Pyridin-3-yl)-2,2-dicyanoethyl] Phosphonic Acid Diethyl Ester (11)**

<sup>1</sup>H NMR (250 MHz, CDCl<sub>3</sub>): δ = 1.18 (t, <sup>3</sup>J<sub>HH</sub> = 6.8 Hz, 3 H, CH<sub>3</sub>), 1.33 (t, <sup>3</sup>J<sub>HH</sub> = 7.0 Hz, 3 H, CH<sub>3</sub>), 3.65 (dd, <sup>2</sup>J<sub>HP</sub> = 21.6 Hz, <sup>3</sup>J<sub>HH</sub> = 6.8 Hz, 1 H, ch), 3.92–4.21 (m, 4 H, CH<sub>2</sub>), 4.63 (t, <sup>3</sup>J<sub>HH</sub> = 8.5 Hz, 1 H, CH), 7.39 (t, <sup>3</sup>J<sub>HH</sub> = 6.5 Hz, 1 H, CH), 7.95 (d, <sup>3</sup>J<sub>HH</sub> = 6.5 Hz, 1 H, Ar), 8.67 (s, 2 H, Ar). <sup>13</sup>C NMR (62.9 MHz, CDCl<sub>3</sub>): δ = 16.1 (d, <sup>3</sup>J<sub>CP</sub> = 5.0 Hz), 16.2 (d, <sup>3</sup>J<sub>CP</sub> = 5.0 Hz), 25.3, 42.1 (d, <sup>1</sup>J<sub>CP</sub> = 144.6 Hz), 63.8 (d, <sup>2</sup>J<sub>CP</sub> = 7.0 Hz), 64.5 (d, <sup>2</sup>J<sub>CP</sub> = 7.0 Hz), 110.8 (d, <sup>3</sup>J<sub>CP</sub> = 10.7 Hz), 111.0 (d, <sup>3</sup>J<sub>CP</sub> = 11.9 Hz), 124.0, 126.7, 136.5, 150.5, 150.8. <sup>31</sup>P NMR (101 MHz, CDCl<sub>3</sub>): δ = 19.03. MS (EI, 70 eV):  $m/z$  (%) = 293 (9  $M^+$ ), 156 [100  $M^+$ -P(O)(OEt)<sub>2</sub>], 138 (94), 130 (25), 111 (93). IR (KBr): 2236 (CN), 1011 (P=O) cm<sup>-1</sup>. Anal. Calcd for C<sub>13</sub>H<sub>16</sub>N<sub>3</sub>O<sub>3</sub>P: C, 53.24; H, 5.50; N, 14.33. Found: C, 52.71; H, 5.32; N, 14.04.

**[1-(Furan-2-yl)-2,2-dicyanoethyl] Phosphonic Acid Diethyl Ester (12)**

<sup>1</sup>H NMR (250 MHz, CDCl<sub>3</sub>): δ = 1.24–1.37 (m, 6 H, CH<sub>3</sub>), 3.87 (dd, <sup>2</sup>J<sub>HP</sub> = 22.7 Hz, <sup>3</sup>J<sub>HH</sub> = 6.5 Hz, 1 H, CH), 3.98–4.23 (m, 4 H, CH<sub>2</sub>), 4.51 (t, <sup>3</sup>J<sub>HH</sub> = 8.7 Hz, 1 H, CH), 6.44 (s, 1 H, Ar), 6.62 (s, 1 H, Ar), 7.49 (s, 1 H, Ar).

**[1-(4-Chlorophenyl)-2,2-dicyanoethyl] Phosphonic Acid Dimethyl Ester (15)**

$^1\text{H}$  NMR (400 MHz,  $\text{CDCl}_3$ ):  $\delta$  = 3.61-3.68 (m, 4 H,  $\text{CH}_3$ ), 3.86 (d,  $^3J_{\text{HP}}$  = 11.2 Hz, 3 H,  $\text{CH}_3$ , CH), 4.51 (t,  $^3J_{\text{HH}}$  = 8.0 Hz, 1 H, CH), 7.47 (s, 4 H, Ar).

**[1-(4-Chlorophenyl)-2,2-dicyanoethyl] Phosphonic Acid Di-*iso*-propyl Ester (16)**

$^1\text{H}$  NMR (400 MHz,  $\text{CDCl}_3$ ):  $\delta$  = 1.00 (d,  $^3J_{\text{HH}}$  = 6.4 Hz, 3 H,  $\text{CH}_3$ ), 1.32 (d,  $^3J_{\text{HH}}$  = 6.0 Hz, 3 H,  $\text{CH}_3$ ), 1.39 (d,  $^3J_{\text{HH}}$  = 6.0 Hz, 6 H,  $\text{CH}_3$ ), 3.51 (dd,  $^2J_{\text{HP}}$  = 21.6 Hz,  $^3J_{\text{HH}}$  = 7.2 Hz, 1 H, CH), 4.51–4.57 (m, 2 H, CH), 4.75–4.83 (m, 1 H, CH), 7.43-7.50 (m, 4 H, Ar).

**[1-(4-Chlorophenyl)-2-cyano-2-ethylcarboxylic Acid Ethyl Ester] Phosphonic Acid Diethyl Ester (17)**

$^1\text{H}$  NMR (400 MHz,  $\text{CDCl}_3$ ):  $\delta$  = 1.10-1.15 (m, 3 H,  $\text{CH}_3$ ), 1.19-1.30 (m, 12 H,  $\text{CH}_3$ ), 1.35 (t,  $^3J_{\text{HH}}$  = 7.2 Hz, 3 H,  $\text{CH}_3$ ), 3.77-3.80 (m, 1 H, CH), 3.81-3.85 (m, 1 H, CH), 3.96-4.21 (m, 13 H,  $\text{CH}_2$ , CH), 4.27 (dd,  $^3J_{\text{HH}}$  = 6.0 Hz,  $^3J_{\text{PH}}$  = 8.4 Hz, 1 H, CH), 7.33-7.35 (m, 6 H, Ar), 7.46-7.48 (m, 2 H, Ar).

<sup>1</sup>H NMR, <sup>13</sup>C NMR, IR and mass spectra of β-Phosphonomalonates

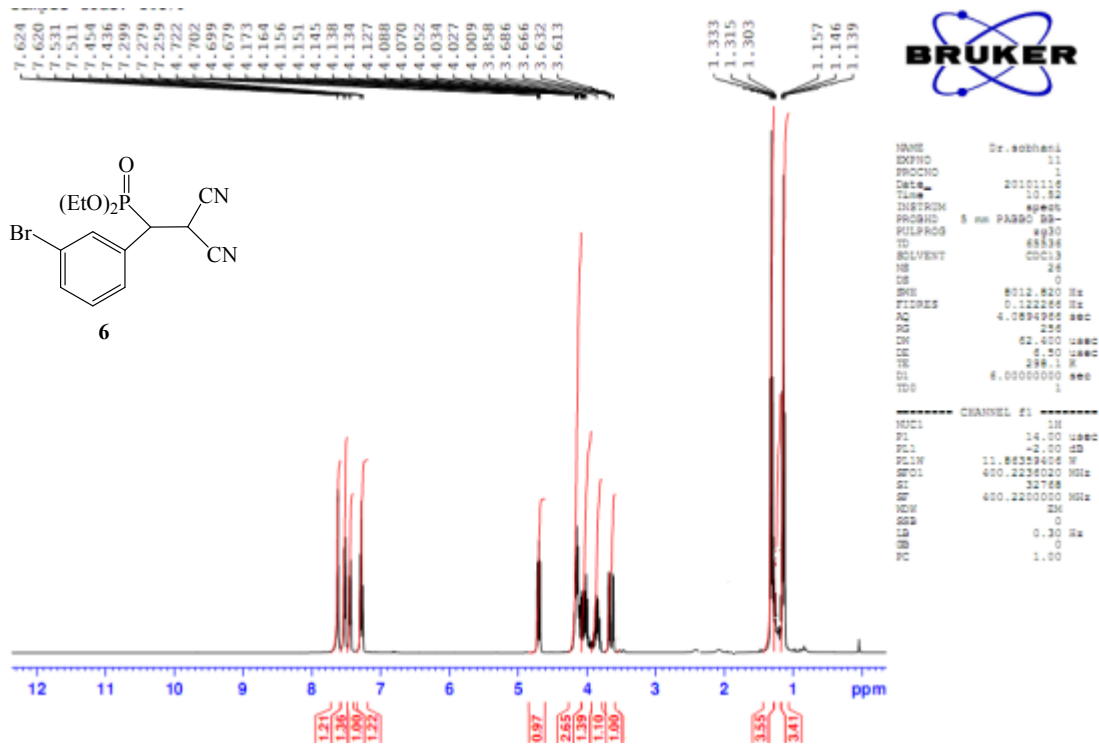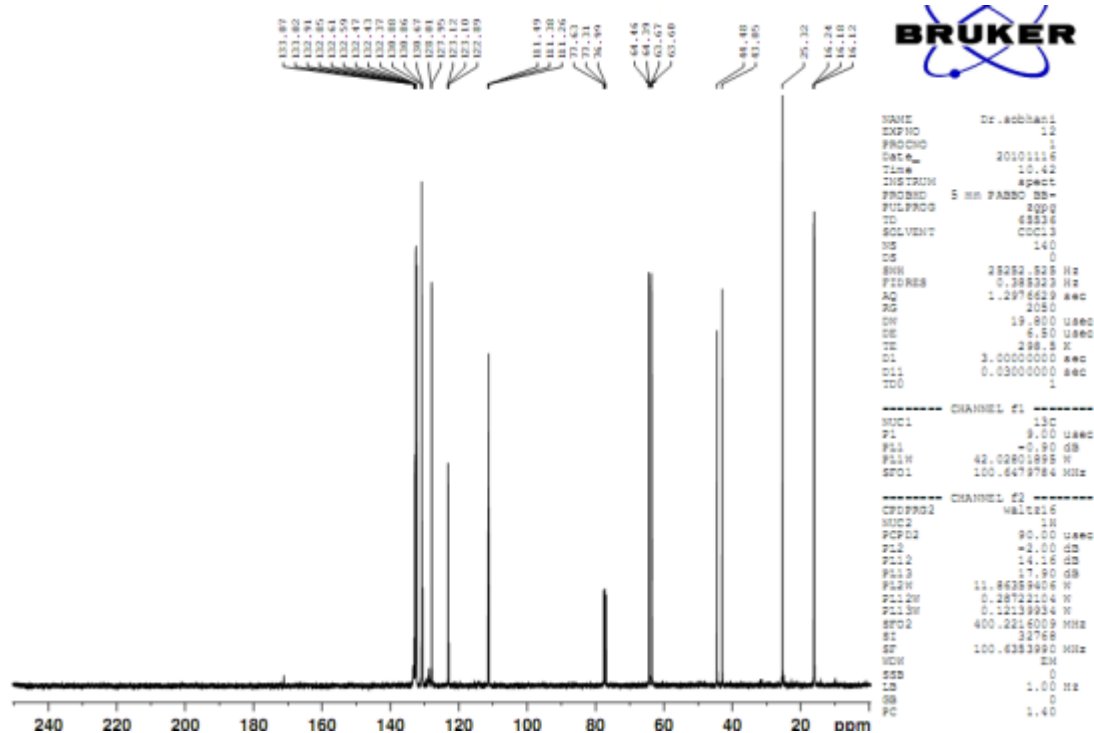



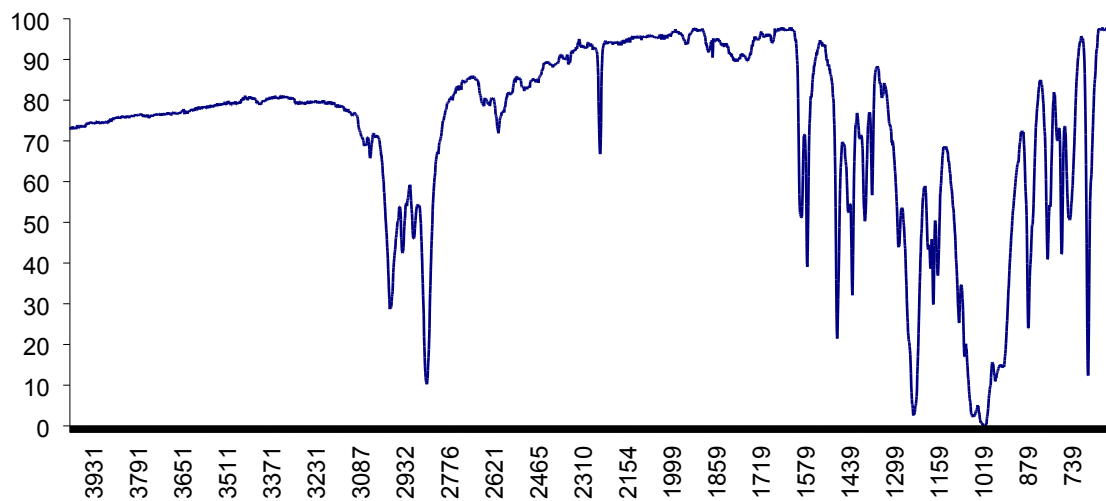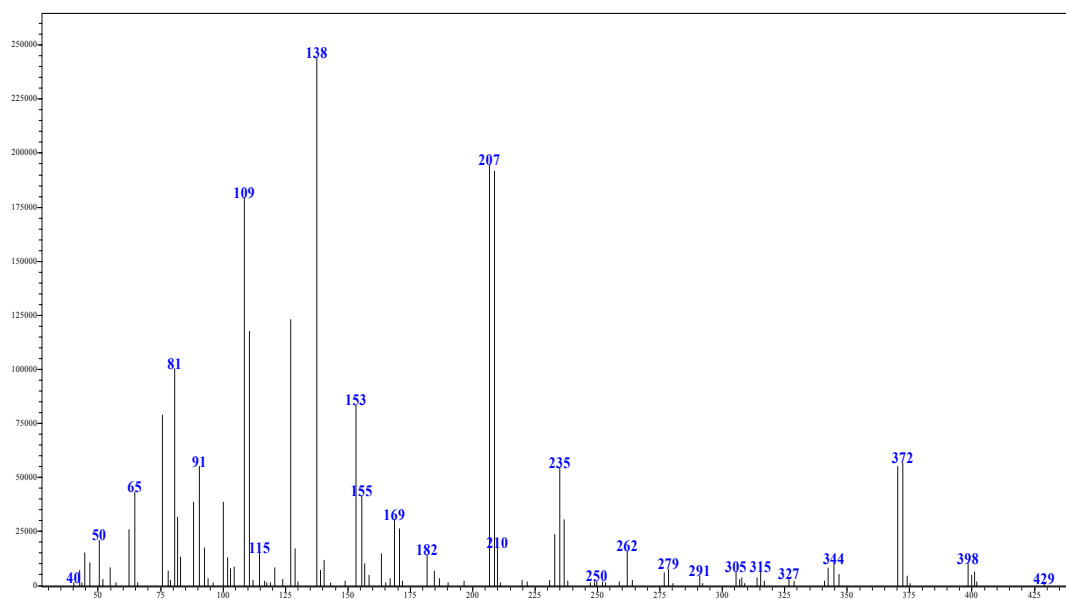

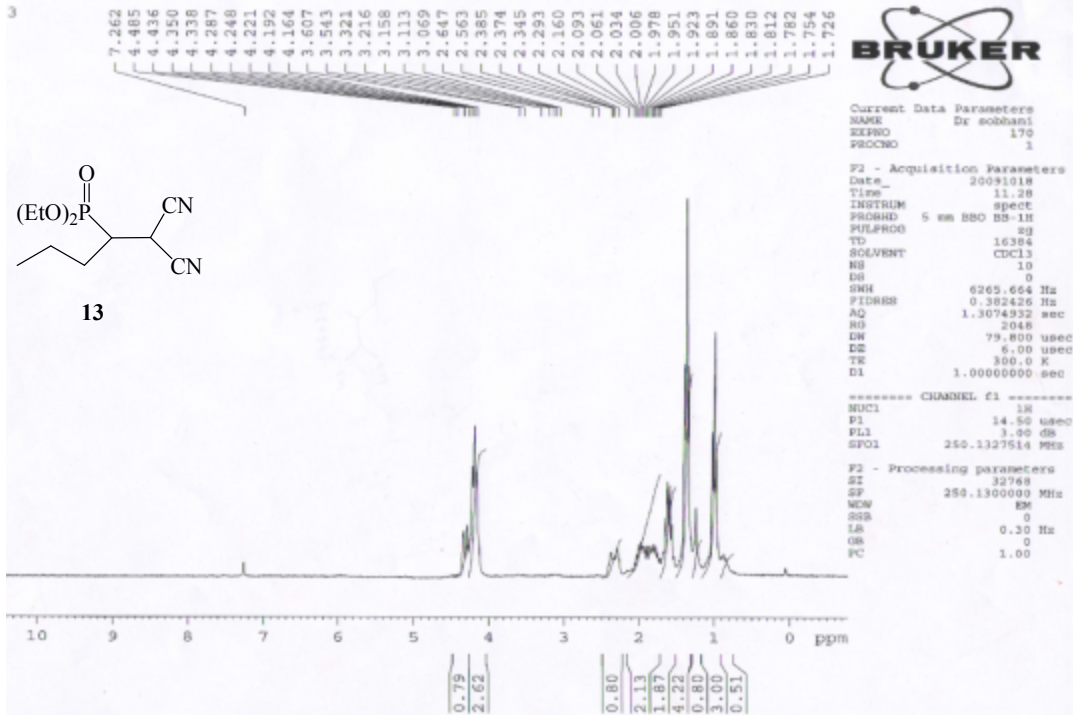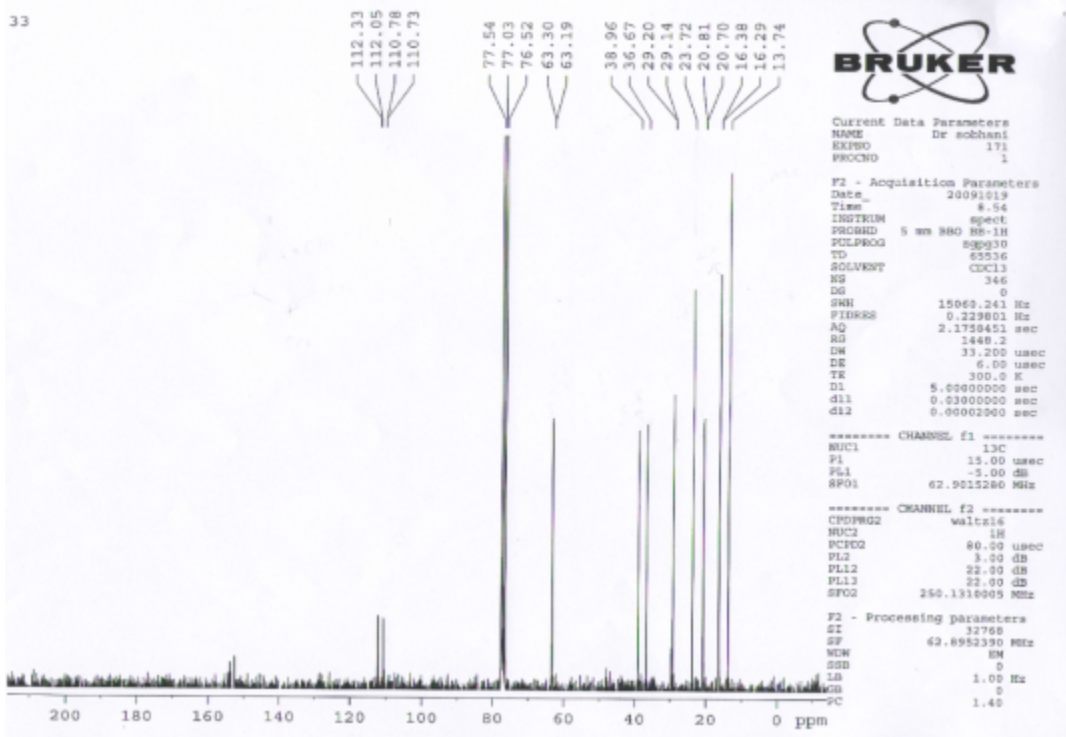

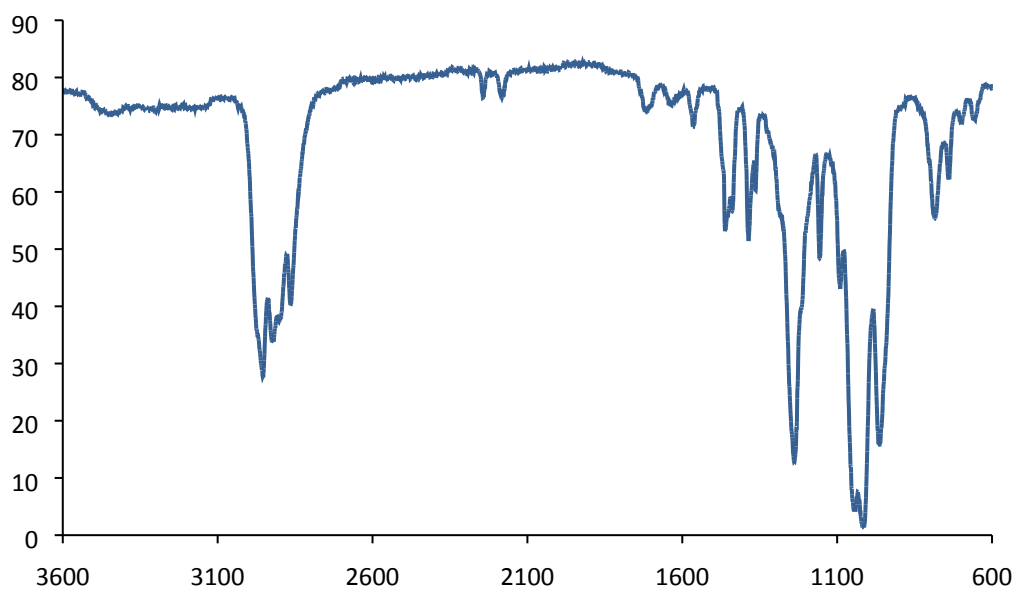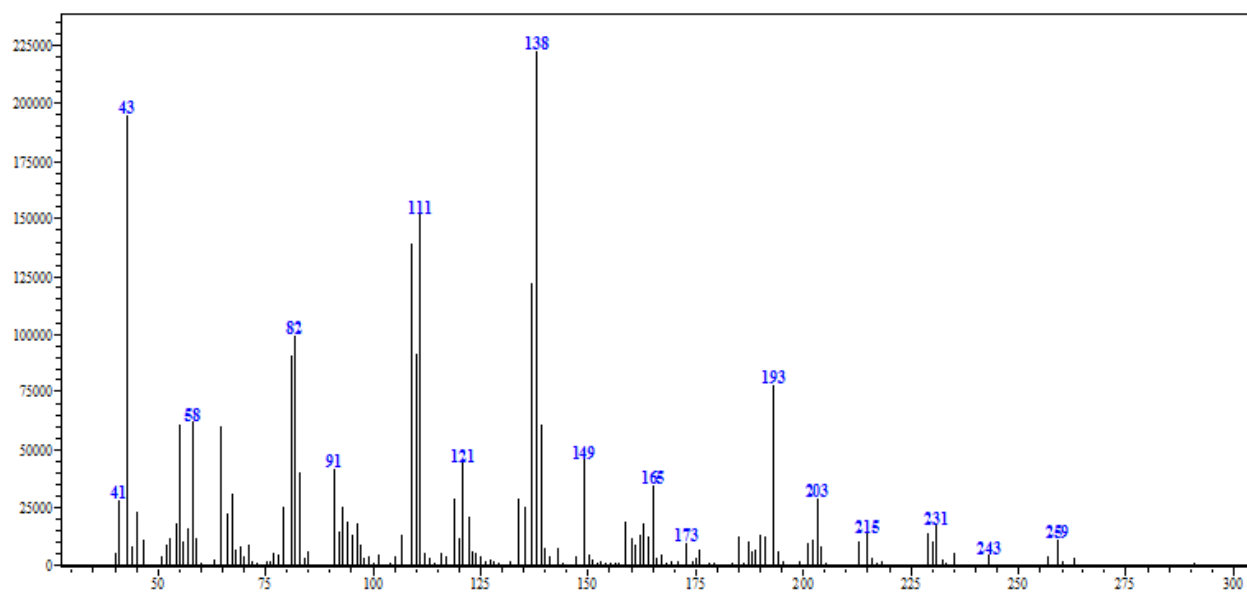

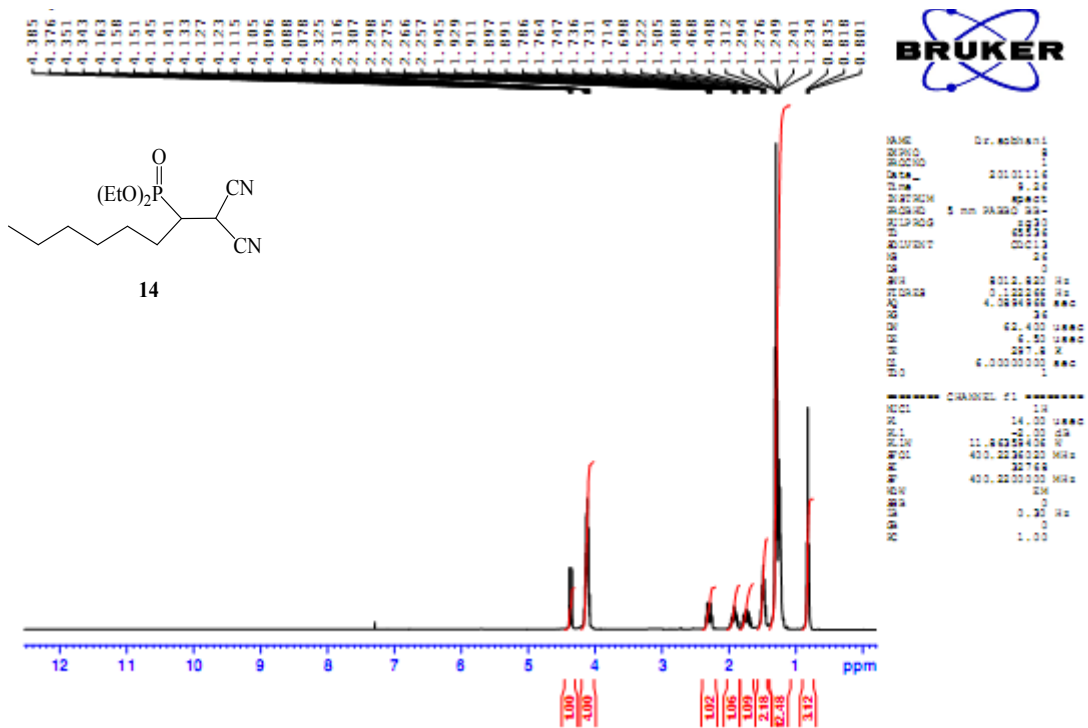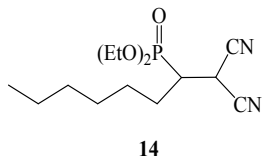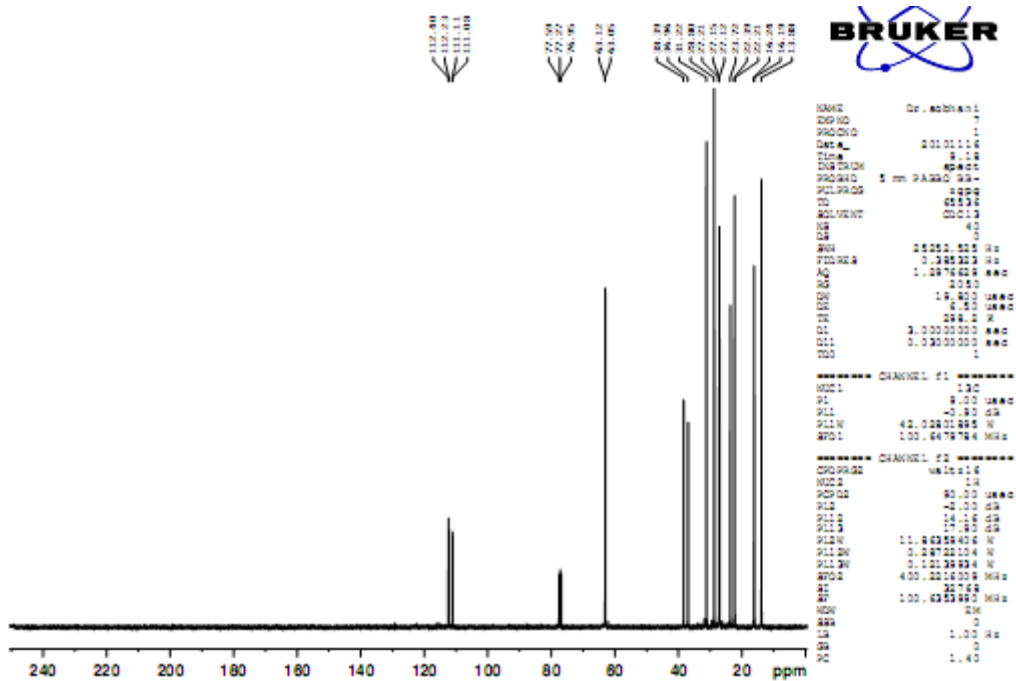

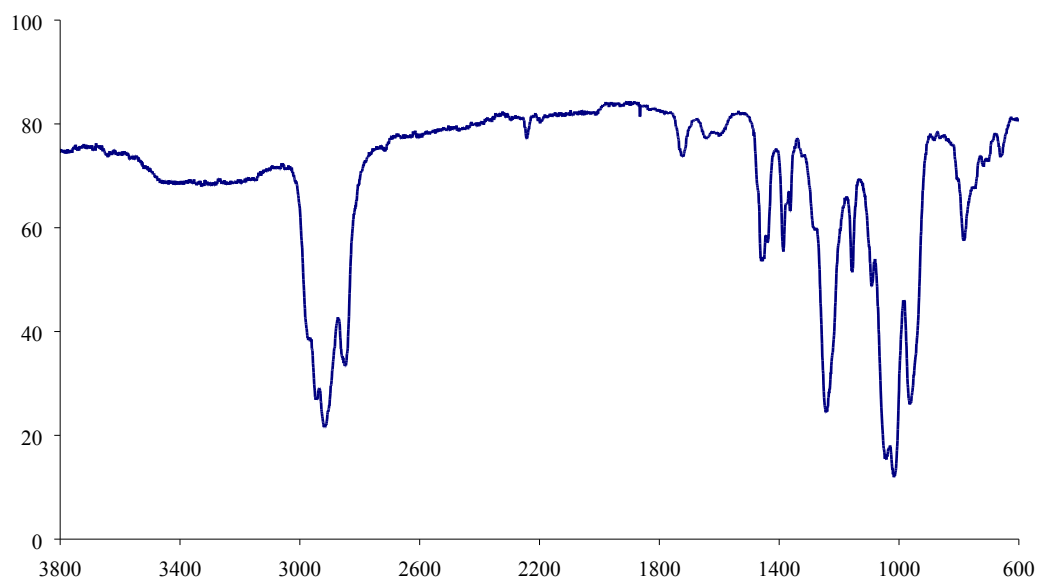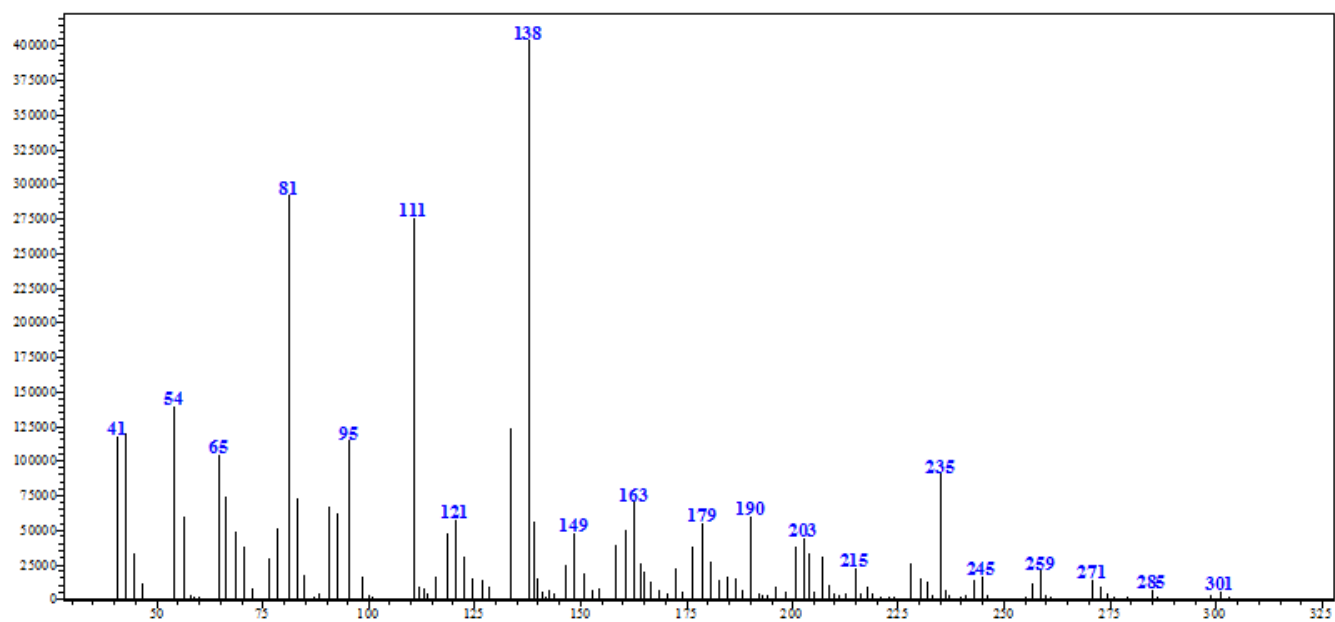

Supplement: c4ra00543k1.pdf [file c4ra00543k1.pdf]
